# Supplementary material for: Targeted HPLC-UV Polyphenolic Profiling to Detect and Quantify Adulterated Tea Samples by Chemometrics
Source: MDPI journal article supplement (doi:10.3390/foods12071501), 2023-04-03
Supplement: s1 [file s1]

## SUPPLEMENTARY MATERIAL

# Targeted HPLC-UV Polyphenolic profiling to detect and quantify adulterated tea samples by chemometrics

Thom Romers<sup>1</sup>, Javier Saurina<sup>1,2</sup>, Sònia Sentellas<sup>1,2,3</sup> and Oscar Núñez<sup>1,2,3,\*</sup>

<sup>1</sup> Department of Chemical Engineering and Analytical Chemistry, Universitat de Barcelona, Martí i Franquès 1-11, E08028 Barcelona, Spain.

<sup>2</sup> Research Institute in Food Nutrition and Food Safety, Universitat de Barcelona, Av. Prat de la Riba 171, Edifici Recerca (Gaudí), E08921 Santa Coloma de Gramenet, Spain.

<sup>3</sup> Serra Hùnter Fellow, Departament de Recerca i Universitats, Generalitat de Catalunya, Via Laietana 2, E08003 Barcelona, Spain.

\* Correspondence: oscar.nunez@ub.edu

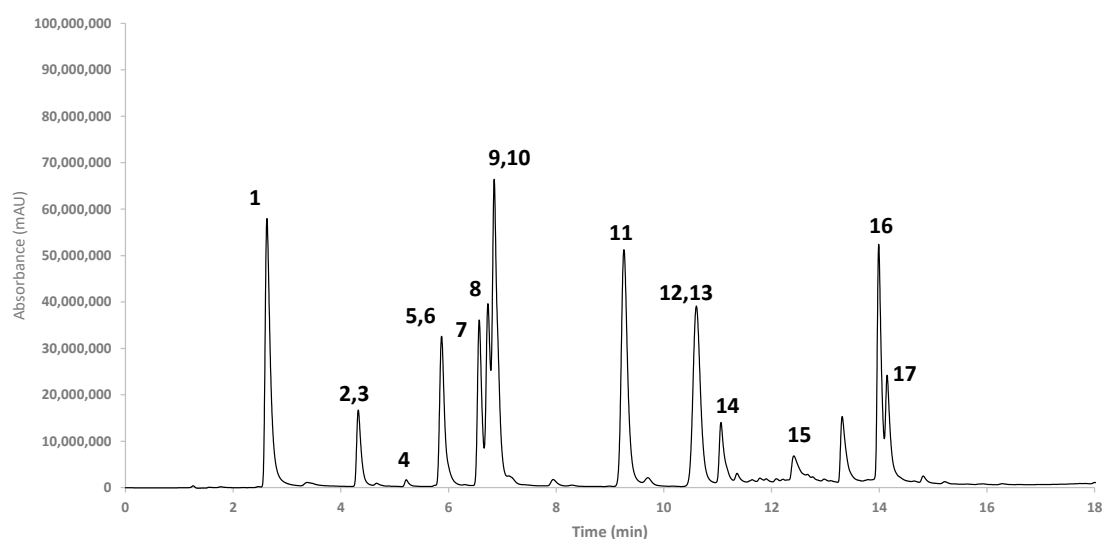

**Figure S1.** HPLC-UV (at 280 nm) separation of a polyphenolic and phenolic acid mixture at 20 mg L<sup>-1</sup>. Peak identification: 1, gallic acid; 2, protocatechuic acid; 3, quercetin; 4, (-)-epigallocatechin; 5, (+)-catechin; 6, 4-hydroxybenzoic acid; 7, vanillic acid; 8, caffeic acid; 9, syringic acid; 10, (-)-epicatechin; 11, *p*-coumaric acid; 12, ferulic acid; 13, sinapic acid; 14, rutin; 15, myrcetin; 16, apigenin; 17, kaempferol.

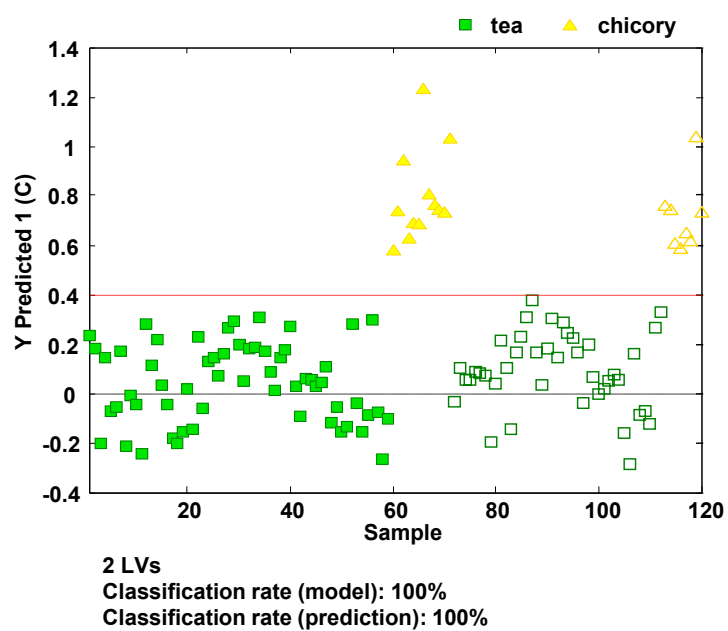

**Figure S2.** Validation of the paired PLS-DA model of all tea varieties versus chicory when using targeted HPLC-UV polyphenolic profiles as the sample chemical descriptors. Red line means the separation threshold between classes. Filled and empty symbols correspond to the calibration and validation sets, respectively.

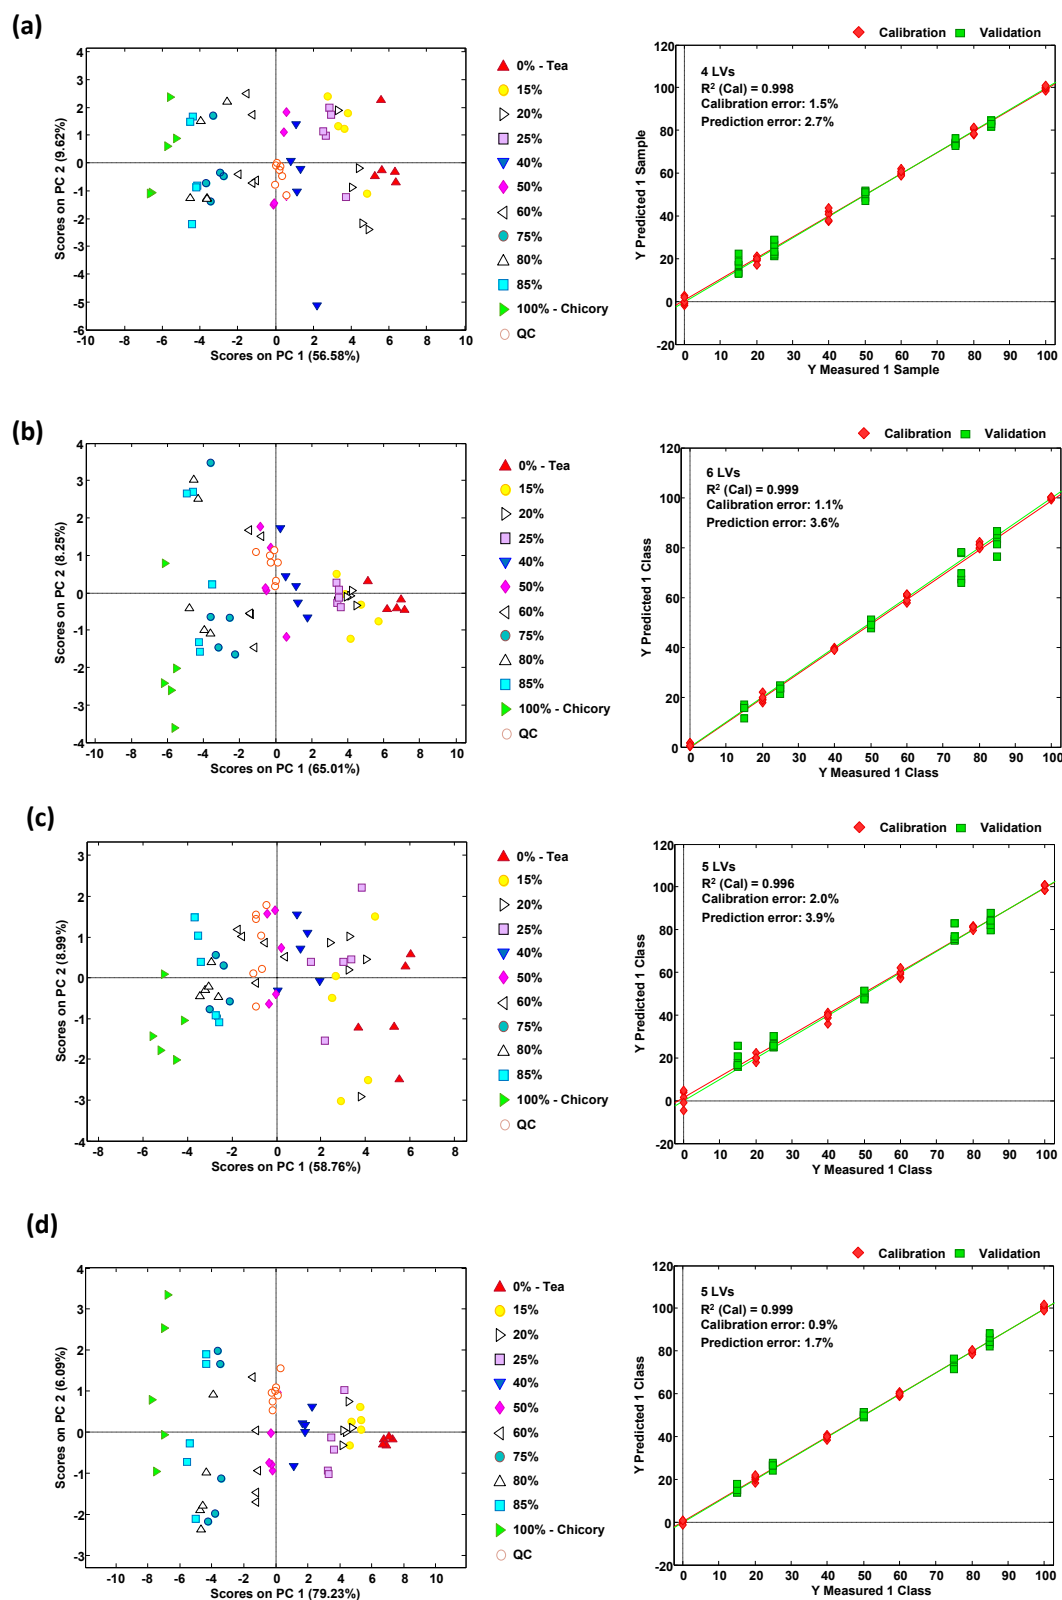

**Figure S3.** PCA (PC1 vs. PC2) and PLS results of (a) black tea, (b) white tea, (c) red tea, and (d) oolong tea adulterated with chicory. Left plots: PCA scatter plots showing the distribution of both calibration and prediction samples according to the adulteration level. Right plots: scatter plots of measured vs. predicted percentages of chicory adulterant.

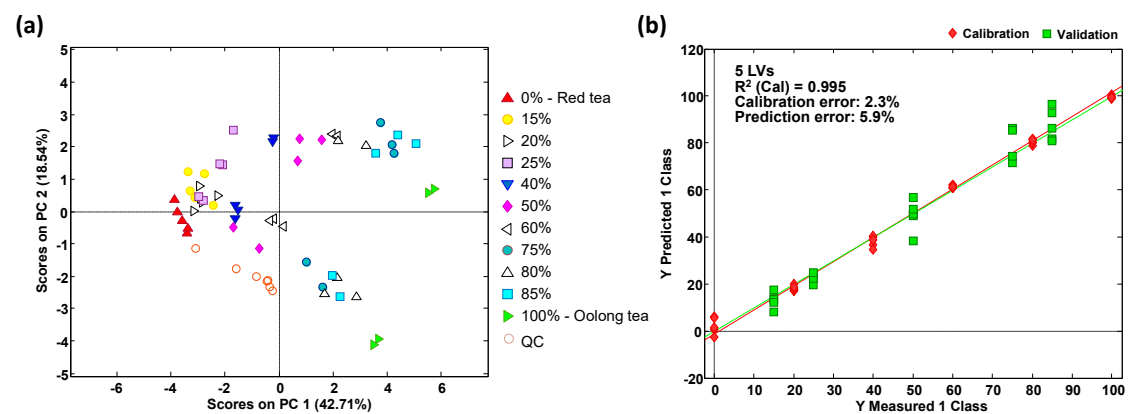

**Figure S4:** (a) PCA (PC1 vs. PC2) and (b) PLS results of red tea extracts blended with oolong tea extracts (considered as the adulterant).

**Table S1.** Detailed information about the analyzed tea and chicory samples.

| Sample type | Commercial name                                     | Production country | Number of samples (different lots) |
|-------------|-----------------------------------------------------|--------------------|------------------------------------|
| Black tea   | Ceylon black tea                                    | Sri Lanka          | 2                                  |
|             | Irish blend                                         | India              | 2                                  |
|             | Strong English breakfast                            | Sri Lanka          | 2                                  |
|             | Yunnan finest tippy, premium                        | China              | 2                                  |
|             | India Assam maud                                    | India              | 1                                  |
|             | Kenya Marnyin                                       | Kenya              | 1                                  |
|             | Darjeeling ringtong (second harvest)                | India              | 1                                  |
|             | Darjeeling first flush (first harvest)              | India              | 2                                  |
|             | Formosa tarry lapsang souchong                      | Taiwan             | 2                                  |
|             | Ceylon quality blend                                | Sri Lanka          | 1                                  |
|             | Ceylon Nuwara eliya                                 | Sri Lanka          | 1                                  |
|             | Korakundah mountain tea                             | India              | 2                                  |
|             | Darjelling margaret's hope (first harvest, premium) | India              | 1                                  |
| Green tea   | Organic gunpowder                                   | China              | 2                                  |
|             | Pi lo chun (premium)                                | Taiwan             | 2                                  |
|             | Sencha (Zhejiang)                                   | China              | 2                                  |
|             | Lung ching                                          | China              | 2                                  |
|             | Sencha (premium)                                    | China              | 2                                  |
|             | Japan Bancha premium                                | Japan              | 2                                  |
|             | Japan gyokuro organic                               | Japan              | 2                                  |
|             | Mao Feng Jiangsu                                    | China              | 2                                  |
|             | Assam Jamguri green                                 | India              | 2                                  |
|             | Japan Kukicha organic                               | Japan              | 2                                  |
| Oolong tea  | Dong ding oolong                                    | Taiwan             | 10                                 |
|             | Tie kuan yin                                        | China              | 10                                 |
| Red tea     | Pu erh Royal (special fermentation)                 | China              | 5                                  |
|             | Pu erh Original                                     | China              | 5                                  |
|             | Pu erh Imperial (manual harvesting)                 | China              | 5                                  |
|             | Pu erh Royal Palace                                 | China              | 5                                  |
| White tea   | Pai Mu tan                                          | China              | 5                                  |
|             | Silver needles (premium, artisanal production)      | China              | 5                                  |
|             | Imperial Himalayan White Tea                        | India              | 5                                  |
|             | Vietnam Mao Feng Organic                            | Vietnam            | 5                                  |
| Chicory     | Chicory roots, Valley of Tea                        | Belgium            | 7                                  |
|             | Chicory roots, Health Embassy                       | England            | 7                                  |
|             | Chicory roots, Especies Pedroza                     | Spain              | 6                                  |

**Table S2.** Blends of each tea variety adulterated with chicory according to the percentage of chicory employed. X is a pooled tea variety sample (from 10 different tea samples). C1 to C3 represent the three different chicory samples (not pooled) employed as adulterants.

| Adulteration level [%] | Tea | Chicory | Adulteration level [%] | Tea | Chicory |
|------------------------|-----|---------|------------------------|-----|---------|
| 0                      | X1  |         | 60                     | X1  | C2      |
|                        | X2  |         |                        | X2  | C3      |
|                        | X3  |         |                        | X3  | C1      |
|                        | X4  |         |                        | X4  | C2      |
|                        | X5  |         |                        | X5  | C3      |
| 15                     | X1  | C1      | 75                     | X1  | C1      |
|                        | X2  | C2      |                        | X2  | C2      |
|                        | X3  | C3      |                        | X3  | C3      |
|                        | X4  | C1      |                        | X4  | C1      |
|                        | X5  | C2      |                        | X5  | C2      |
| 20                     | X1  | C3      | 80                     | X1  | C3      |
|                        | X2  | C1      |                        | X2  | C1      |
|                        | X3  | C2      |                        | X3  | C2      |
|                        | X4  | C3      |                        | X4  | C3      |
|                        | X5  | C1      |                        | X5  | C1      |
| 25                     | X1  | C2      | 85                     | X1  | C2      |
|                        | X2  | C3      |                        | X2  | C3      |
|                        | X3  | C1      |                        | X3  | C1      |
|                        | X4  | C2      |                        | X4  | C2      |
|                        | X5  | C3      |                        | X5  | C3      |
| 40                     | X1  | C1      | 100                    |     | C1      |
|                        | X2  | C2      |                        |     | C2      |
|                        | X3  | C3      |                        |     | C3      |
|                        | X4  | C1      |                        |     | C1      |
|                        | X5  | C2      |                        |     | C2      |
| 50                     | X1  | C3      |                        |     |         |
|                        | X2  | C1      |                        |     |         |
|                        | X3  | C2      |                        |     |         |
|                        | X4  | C3      |                        |     |         |
|                        | X5  | C1      |                        |     |         |
